# Supplementary material for: Immunomagnetic Separation Improves the Detection of Mycobacteria by Paper-Based Lateral and Vertical Flow Immunochromatographic Assays
Source: MDPI journal article supplement (doi:10.3390/s21185992), 2021-09-07
Supplement: s1 [file s1]

## Supplementary Material

# Immunomagnetic separation improves the detection of mycobacteria by paper-based lateral and vertical flow immunochromatographic assays

Alejandra Ben Aissa<sup>1</sup>, Barbara Araújo<sup>1,4</sup>, Esther Julian<sup>3</sup>, Maria Valnice Boldrin Zanoni<sup>4</sup> and María Isabel Pividori<sup>1,2,\*</sup>

- 1 Departament de Química, Universitat Autònoma de Barcelona, 08193, Bellaterra, Spain.
- 2 Institute of Biotechnology and Biomedicine, Universitat Autònoma de Barcelona, Bellaterra, Spain.
- 3 Departament de Genètica i de Microbiologia, Facultat de Biociències, Universitat Autònoma de Barcelona, Bellaterra, Spain
- 4 Department of Analytical Chemistry, Institute of Chemistry, UNESP-Univ Estadual Paulista, Araraquara, SP, Brazil

\* Correspondence: Isabel.Pividori@uab.cat; Tel.: (+34 93 581 1976)

## 2. Materials and Methods

### 2.9. Double-tagging PCR for the amplification of Mycobacteria

**Table S1.** Thermal cycler conditions for the double-tagging PCR

|                  | Initial step | DNA denaturation | Annealing | Extension | Last step |
|------------------|--------------|------------------|-----------|-----------|-----------|
|                  | 1 cycle      | 40 cycles        |           |           | 1 cycle   |
| Temperature (°C) | 95           | 95               | 60        | 72        | 72        |
| Time (s)         | 300          | 40               | 30        | 120       | 600       |

### 3. Results and Discussion

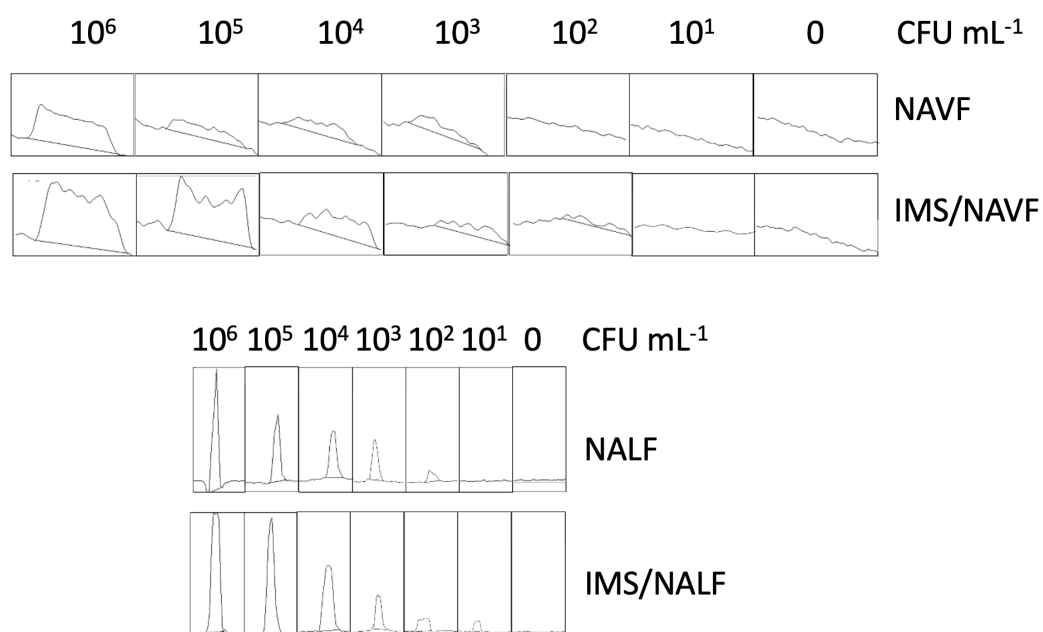

**Figure S1.** The relative areas obtained after processing the images, and which were plotted in Figure 6 and 7, are shown for both platforms and sample treatments. NAVF, Nucleic Acid Vertical Flow; IMS, immunomagnetic separation; NALF, Nucleic Acid Lateral flow.
